# Supplementary material for: Gut Microbiota and Metabolome Alterations Associated with Chinese Monks’ Practice
Source: Research Square preprint supplement (doi:10.21203/rs.3.rs-1198747/v1), 2022-01-10
Supplement: Supplementary file 1 [file 60917887afa99af0e27cd24a.docx]

Table S4 The class of differential metabolites in H and L group according to the HMDB database.

| Metabolite | Super class | Class |
| --- | --- | --- |
| 5-Hydroxyflavone | Phenylpropanoids and polyketides | Flavonoids |
| 2-Indolecarboxylic acid | Organoheterocyclic compounds | Indoles and derivatives |
| Incensole oxide/Indoleacrylic acid | Organoheterocyclic compounds | Indoles and derivatives |
| Indoleacrylic acid | Organoheterocyclic compounds | Indoles and derivatives |
| 2-Formaminobenzoylacetate | Organic oxygen compounds | Organooxygen compounds |
| Kinetensin 1-3 | Organic acids and derivatives | Carboxylic acids and derivatives |
| Acetyl-L-tyrosine | Organic acids and derivatives | Carboxylic acids and derivatives |
| Valyl-Hydroxyproline | Organic acids and derivatives | Carboxylic acids and derivatives |
| MG(0:0/18:2(9Z,12Z)/0:0) | Lipids and lipid-like molecules | Fatty Acyls |
| DG(16:0/18:0/0:0) | Lipids and lipid-like molecules | Lipids and lipid-like molecules |
| 2-Linoleoyl Glycerol | Lipids and lipid-like molecules | Fatty Acyls |
| Glycocholic Acid | Lipids and lipid-like molecules | Steroids and steroid derivatives |
| PS(18:1(9Z)/18:0) | Lipids and lipid-like molecules | Glycerophospholipids |
| 17-keto-4(Z),7(Z),10(Z),13(Z),15(E),19(Z)-Docosahexaenoic Acid | Lipids and lipid-like molecules | Fatty Acyls |
| Cer(d18:0/17:0) | Lipids and lipid-like molecules | Sphingolipids |
| Cer(d16:1/22:1) | Lipids and lipid-like molecules | Sphingolipids |
| LysoPE(0:0/18:1(11Z)) | Lipids and lipid-like molecules | Glycerophospholipids |
| 1-Stearoylglycerophosphoserine | Lipids and lipid-like molecules | Glycerophospholipids |
| Geranyl 2-ethylbutyrate | Lipids and lipid-like molecules | Fatty Acyls |
| 2-Isopropylmalic acid | Lipids and lipid-like molecules | Fatty Acyls |
| MG(16:0/0:0/0:0) | Lipids and lipid-like molecules | Glycerolipids |
| 6-pentadecyl Salicylic Acid | Benzenoids | Benzene and substituted derivatives |
| Ginkgoic acid | Benzenoids | Benzene and substituted derivatives |
