# Supplementary material for: Gut Microbiota and Metabolome Alterations Associated with Chinese Monks’ Practice
Source: Research Square preprint supplement (doi:10.21203/rs.3.rs-1198747/v1), 2022-01-10
Supplement: Supplementary file 4 [file ac44e4e24c3c6a3e33b379b3.docx]

Table S1 The class of differential metabolites in monks and controls according to the HMDB database.

| Metabolite | Super Class | Class |
| --- | --- | --- |
| 2-Indolecarboxylic acid | Organoheterocyclic compounds | Indoles and derivatives |
| Pelmine | Organoheterocyclic compounds | Pyridines and derivatives |
| Kynurenic acid | Organoheterocyclic compounds | Quinolines and derivatives |
| Indoleacrylic acid | Organoheterocyclic compounds | Indoles and derivatives |
| 2-(2,6-dihydroxy-3,4-dimethoxycyclohexylidene)acetonitrile | Organic oxygen compounds | Organooxygen compounds |
| 1-[(5-Amino-5-carboxypentyl)amino]-1-deoxyfructose | Organic oxygen compounds | Organooxygen compounds |
| Lotaustralin | Organic oxygen compounds | Organooxygen compounds |
| Cadaverine | Organic nitrogen compounds | Organonitrogen compounds |
| 2-Hydroxyphenethylamine | Organic nitrogen compounds | Organonitrogen compounds |
| Putreanine | Organic acids and derivatives | Carboxylic acids and derivatives |
| N-docosanoyl taurine | Organic acids and derivatives | Organic sulfonic acids and derivatives |
| N-arachidonoyl tyrosine | Organic acids and derivatives | Carboxylic acids and derivatives |
| (3S)-3,6-Diaminohexanoate | Organic acids and derivatives | Carboxylic acids and derivatives |
| Valyl-Hydroxyproline | Organic acids and derivatives | Carboxylic acids and derivatives |
| Valyl-Valine | Organic acids and derivatives | Carboxylic acids and derivatives |
| 3-Aminocaproic acid | Organic acids and derivatives | Carboxylic acids and derivatives |
| Acetyl-DL-Valine | Organic acids and derivatives | Carboxylic acids and derivatives |
| L-Dopa | Organic acids and derivatives | Carboxylic acids and derivatives |
| 5'-Methylthioadenosine | Nucleosides, nucleotides, and analogues | 5'-deoxyribonucleosides |
| PG(18:1(9Z)/0:0) | Lipids and lipid-like molecules | Glycerophospholipids |
| Deoxycholic acid glycine conjugate | Lipids and lipid-like molecules | Steroids and steroid derivatives |
| PE(14:0/0:0) | Lipids and lipid-like molecules | Glycerophospholipids |
| Porrigenin A | Lipids and lipid-like molecules | Prenol lipids |
| LysoPE(15:0/0:0) | Lipids and lipid-like molecules | Glycerophospholipids |
| PS(22:2(13Z,16Z)/22:0) | Lipids and lipid-like molecules | Glycerophospholipids |
| 6-keto PGE1 | Lipids and lipid-like molecules | Fatty Acyls |
| MG(0:0/18:2(9Z,12Z)/0:0) | Lipids and lipid-like molecules | Fatty Acyls |
| LysoPE(0:0/18:1(11Z)) | Lipids and lipid-like molecules | Glycerophospholipids |
| Solasodine | Lipids and lipid-like molecules | Steroids and steroid derivatives |
| LysoPE(18:0/0:0) | Lipids and lipid-like molecules | Glycerophospholipids |
| Secasterone | Lipids and lipid-like molecules | Steroids and steroid derivatives |
| 2-Formaminobenzoylacetate | [Benzenoids](http://classyfire.wishartlab.com/tax_nodes/C0002448" \o "http://classyfire.wishartlab.com/tax_nodes/C0002448) | [Naphthalenes](http://classyfire.wishartlab.com/tax_nodes/C0000023" \o "http://classyfire.wishartlab.com/tax_nodes/C0000023) |
| Berberine | Alkaloids and derivatives | Protoberberine alkaloids and derivatives |
| 4-Hydroxynornantenine | Alkaloids and derivatives | Aporphines |
