# Supplementary material for: Gut Microbiota and Metabolome Alterations Associated with Chinese Monks’ Practice
Source: Research Square preprint supplement (doi:10.21203/rs.3.rs-1198747/v1), 2022-01-10
Supplement: Supplementary file 7 [file 69133148fa9e7d45f2eec17c.docx]

Table S3 The thirteen metabolic pathways based on KEGG pathways enrichment analysis in monks and controls.

| Pathway Description | Number | Pvalue_uncorrected | Pvalue_corrected | Metabolite |
| --- | --- | --- | --- | --- |
| Biosynthesis of plant secondary metabolites | 3 | 0.0014 | 0.0311 | L-Dopa, Cadaverine, 5'-Methylthioadenosine |
| Betalain biosynthesis | 1 | 0.0393 | 0.0696 | L-Dopa |
| Parkinson disease | 1 | 0.0248 | 0.0518 | L-Dopa |
| Dopaminergic synapse | 1 | 0.0198 | 0.0507 | L-Dopa |
| Prolactin signaling pathway | 1 | 0.0182 | 0.0523 | L-Dopa |
| Alcoholism | 1 | 0.0166 | 0.0544 | L-Dopa |
| Amphetamine addiction | 1 | 0.0149 | 0.0572 | L-Dopa |
| Cocaine addiction | 1 | 0.0116 | 0.0535 | L-Dopa |
| Tryptophan metabolism | 2 | 0.0076 | 0.0579 | L-Dopa |
| Biosynthesis of alkaloids derived from shikimate pathway | 2 | 0.0224 | 0.0515 | Berberine,L-Dopa |
| Isoquinoline alkaloid biosynthesis | 2 | 0.0099 | 0.0568 | Berberine,L-Dopa |
| AMPK signaling pathway | 1 | 0.0361 | 0.0692 | Berberine |
| Lysine degradation | 2 | 0.0032 | 0.0365 | (3S)-3,6-Diaminohexanoate, Cadaverine |
