# Supplementary material for: Gut Microbiota and Metabolome Alterations Associated with Chinese Monks’ Practice
Source: Research Square preprint supplement (doi:10.21203/rs.3.rs-1198747/v1), 2022-01-10
Supplement: Supplementary file 8 [file 8d1cd1adc7c185002ec31e27.docx]

Table S2 The KEGG pathways of KEGG functional annotation analysis in monks and controls.

| First Category | Second Category | Number | Metabolite |
| --- | --- | --- | --- |
| Environmental Information Processing | Signal transduction | 1 | Berberine |
| Human Diseases | Neurodegenerative diseases | 1 | L-Dopa |
| Human Diseases | Substance dependence | 1 | L-Dopa |
| Metabolism | Amino acid metabolism | 6 | 2-Formaminobenzoylacetate, 5'-Methylthioadenosine, Kynurenic acid, (3S)-3,6-Diaminohexanoate, L-Dopa, and Cadaverine |
| Metabolism | Biosynthesis of other secondary metabolites | 3 | Berberine, L-Dopa, and Cadaverine |
| Metabolism | Chemical structure transformation maps | 5 | -Methylthioadenosine, Solasodine, Berberine, L-Dopa, and Cadaverine |
| Metabolism | Lipid metabolism | 1 | 6-keto PGE1 |
| Metabolism | Metabolism of other amino acids | 2 | Cadaverine and Lotaustralin |
| Metabolism | Metabolism of terpenoids and polyketides | 1 | 5'-Methylthioadenosine |
| Organismal Systems | Digestive system | 1 | L-Dopa |
| Organismal Systems | Endocrine system | 1 | L-Dopa |
| Organismal Systems | Nervous system | 1 | L-Dopa |
