# Supplementary material for: Gut Microbiota and Metabolome Alterations Associated with Chinese Monks’ Practice
Source: Research Square preprint supplement (doi:10.21203/rs.3.rs-1198747/v1), 2022-01-10
Supplement: Supplementary file 9 [file e51a3444571748174be20c78.docx]

Table S5 The KEGG pathways of KEGG functional annotation analysis in H and L group.

| First Category | Second Category | Number | Metabolite |
| --- | --- | --- | --- |
| Cellular Processes | Cellular community - eukaryotes | 1 | DG(16:0/18:0/0:0) |
| Environmental Information Processing | Signal transduction | 1 | DG(16:0/18:0/0:1) |
| Human Diseases | Cancers: Overview | 1 | DG(16:0/18:0/0:2) |
| Human Diseases | Cancers: Specific types | 1 | DG(16:0/18:0/0:3) |
| Human Diseases | Drug resistance: Antineoplastic | 1 | DG(16:0/18:0/0:4) |
| Human Diseases | Endocrine and metabolic diseases | 1 | DG(16:0/18:0/0:5) |
| Human Diseases | Infectious diseases: Bacterial | 1 | DG(16:0/18:0/0:6) |
| Human Diseases | Infectious diseases: Parasitic | 1 | DG(16:0/18:0/0:7) |
| Metabolism | Amino acid metabolism | 2 | 2-Formaminobenzoylacetate/2-Isopropylmalic acid |
| Metabolism | Carbohydrate metabolism | 1 | 2-Isopropylmalic acid |
| Metabolism | Lipid metabolism | 1 | Glycocholic Acid |
| Organismal Systems | Circulatory system | 1 | DG(16:0/18:0/0:0) |
| Organismal Systems | Digestive system | 2 | DG(16:0/18:0/0:0)/Glycocholic Acid |
| Organismal Systems | Endocrine system | 1 | DG(16:0/18:0/0:0) |
| Organismal Systems | Environmental adaptation | 1 | DG(16:0/18:0/0:1) |
| Organismal Systems | Excretory system | 1 | DG(16:0/18:0/0:2) |
| Organismal Systems | Immune system | 1 | DG(16:0/18:0/0:3) |
| Organismal Systems | Nervous system | 1 | DG(16:0/18:0/0:4) |
| Organismal Systems | Sensory system | 1 | DG(16:0/18:0/0:5) |
